# Supplementary material for: Combination of Ribociclib and Gemcitabine for the Treatment of Medulloblastoma
Source: PubMed Central journal article supplement — Mol Cancer Ther. 2022 Jun 16;21(8):1306–17. doi: 10.1158/1535-7163.MCT-21-0598 (PMC9578677; doi:10.1158/1535-7163.mct-21-0598), 2022-06-16
Supplement: NIHMS1839047-supplement-Supp_Materials.pdf [file NIHMS1839047-supplement-Supp_Materials.pdf]

## Supplementary Material

### Combination of ribociclib and gemcitabine for the treatment of medulloblastoma

Allison Pribnow<sup>1,S,#</sup>, Barbara Jonchere<sup>1,#</sup>, Jingjing Liu<sup>2</sup>, Kyle S. Smith<sup>3</sup>, Olivia Campagne<sup>4</sup>, Ke Xu<sup>5</sup>, Sarah Robinson<sup>1</sup>, Yogesh Patel<sup>3,\*</sup>, Arzu Onar-Thomas<sup>6</sup>, Gang Wu<sup>5</sup>, Clinton F. Stewart<sup>4</sup>, Paul A. Northcott<sup>3</sup>, Jiyang Yu<sup>2</sup>, Giles W. Robinson<sup>7</sup>, Martine F. Roussel<sup>1,&</sup>

Departments of Tumor Cell Biology<sup>1</sup>, Computational Biology<sup>2</sup>, Developmental Neurobiology<sup>3</sup>, Pharmaceutical Sciences<sup>4</sup>, Center for Applied Bioinformatics<sup>5</sup>, Biostatistics<sup>6</sup>, Neuro-Oncology<sup>7</sup>, St. Jude Children's Research Hospital, 262 Danny Thomas Place, Memphis, TN, 38105

# co-authors contributed equally to the work

## Material and Methods

### RNA-sequencing and GSEA analysis

Paired-end RNA sequencing (RNA-seq) reads from human and mouse tumors were mapped to GRCh37-lite and MGSCv37, separately, as previously described (1). Mapped bam files of human tumors were cleansed by XenoCP (2) to remove the contaminating mouse reads. Read counts were quantified by HTSeq-Count (version 0.11.2) based on GENCODE release 19 for the human tumors and GENCODE release M1 for mouse tumors (3). Differentially expressed genes were identified with edgeR (version 3.28.0) and limma (version 3.42.0) (4,5). Gene set enrichment analyses (GSEA) were conducted by stand-alone GSEA software (version 2.2.3) against hallmark gene sets from MSigDB (version 5.2) on the normalized expression matrix composed of samples from two different treatment arms (6,7).

## **Reconstruction of medulloblastoma interactome and inference of gene activity**

After removing 1,165 probe sets with low or invariable expression across samples, 20476 probe sets were used as SJARACNe input. Based on Gene Ontology classification (8), we compiled a list of driver (hub) genes, which consists of 2,002 transcription factor genes and 9,626 signaling factors. A transcription factor and a signaling molecule network were generated separately using SJARACNe, with drivers (hubs) linked to their targets through interactions (edges) based on gene-gene relationship derived from their expression pattern. The transcription factor network contained 18,314 nodes (genes) and 263,440 edges; the signaling network included 18,333 nodes (genes) and 424,897 edges. After combining these two networks, the final data-driven MBI consisted of 28,004 nodes (genes) and 688,337 edges, among which, there were 9,602 unique hub genes, including 1,733 transcriptional factors and 7,869 signaling molecules.

After cleansing and quantification of the reads, RNA-seq gene expression values were  $\log_2(\text{FPKM}+0.1)$  transformed. For each dataset, genes were selected by two cutoffs before calculating driver activity: (a) removing the low expression genes, whose values in 80% of the samples were below the 10<sup>th</sup> percentiles of all expression values, and (b) keeping 70% of genes with the highest standard deviation. For the sequenced mouse samples, the mouse geneSymbol was converted to human geneSymbol by using the biomaRt package (version=2.42.1). Pathway enrichment of top differentially activated genes were performed by Fisher's exact test against gene sets in MSigDB (version 5.2).

## Reference

1. Wu G, Barnhill RL, Lee S, Li Y, Shao Y, Easton J, *et al.* The landscape of fusion transcripts in spitzoid melanoma and biologically indeterminate spitzoid tumors by RNA sequencing. *Mod Pathol* 2016;**29**(4):359-69 doi 10.1038/modpathol.2016.37.
2. Rusch MD, L.; Arunachalam, S.; Thrasher, A.; Jin, H.; Macias, M.; Kasper, L.; Silveira, A.; Dyer, M.A.; Baker, S.J.; Zhang, J. XenoCP: Cloud-based BAM cleansing tool for RNA and DNA from Xenograft. bioRxiv2020.
3. Anders S, Pyl PT, Huber W. HTSeq--a Python framework to work with high-throughput sequencing data. *Bioinformatics* 2015;**31**(2):166-9 doi 10.1093/bioinformatics/btu638.
4. Robinson MD, McCarthy DJ, Smyth GK. edgeR: a Bioconductor package for differential expression analysis of digital gene expression data. *Bioinformatics* 2010;**26**(1):139-40 doi 10.1093/bioinformatics/btp616.
5. Ritchie ME, Phipson B, Wu D, Hu Y, Law CW, Shi W, *et al.* limma powers differential expression analyses for RNA-sequencing and microarray studies. *Nucleic Acids Res* 2015;**43**(7):e47 doi 10.1093/nar/gkv007.
6. Subramanian A, Tamayo P, Mootha VK, Mukherjee S, Ebert BL, Gillette MA, *et al.* Gene set enrichment analysis: a knowledge-based approach for interpreting genome-wide expression profiles. *Proc Natl Acad Sci U S A* 2005;**102**(43):15545-50 doi 10.1073/pnas.0506580102.
7. Liberzon A, Birger C, Thorvaldsdottir H, Ghandi M, Mesirov JP, Tamayo P. The Molecular Signatures Database (MSigDB) hallmark gene set collection. *Cell Syst* 2015;**1**(6):417-25 doi 10.1016/j.cels.2015.12.004.
8. Ashburner M, Ball CA, Blake JA, Botstein D, Butler H, Cherry JM, *et al.* Gene ontology: tool for the unification of biology. The Gene Ontology Consortium. *Nat Genet* 2000;**25**(1):25-9 doi 10.1038/75556.

## Supplementary Table

Once Supplementary Table provided as an excel file

## Supplementary Figures

Ten Supplementary Figures

## SJMBG3-12-5950

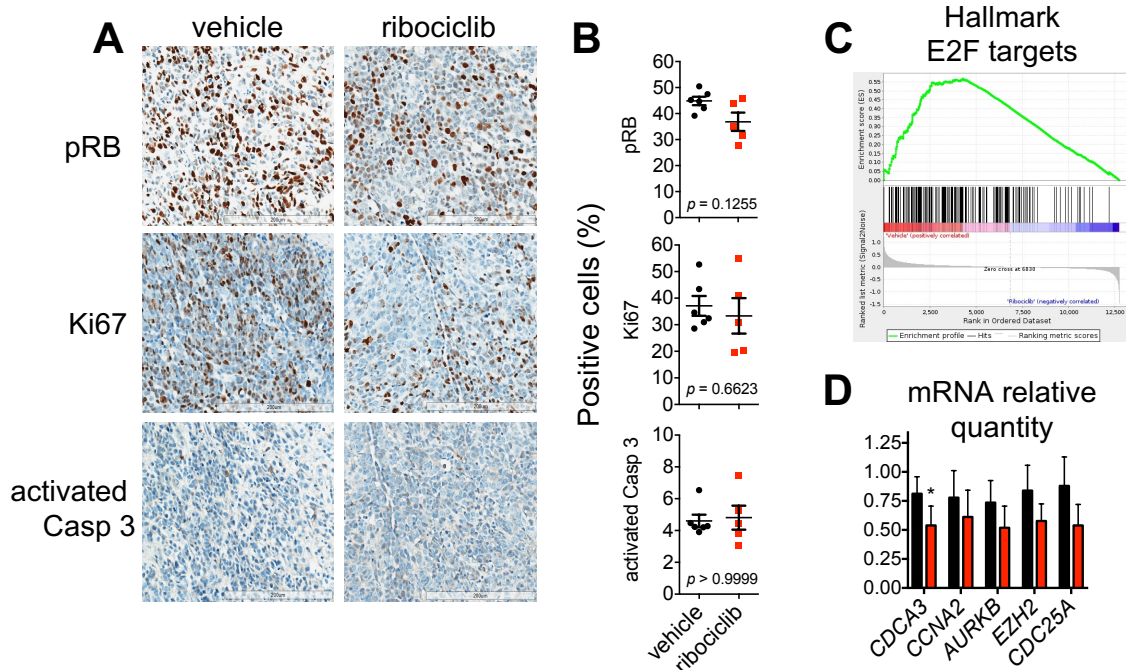

**Supplementary Figure S1. Ribociclib suppresses the expression of E2F target genes in a human G3MB tumor.** (A-D) Mice bearing human G3MB PDOX SJMBG3-12-5950 tumors treated with vehicle or ribociclib (100mg/kg), daily for 5 days and euthanized 4h post last dose. (A) Representative immunohistochemistry images of tumors stained with antibodies against pRb<sup>Ser807/811</sup> (pRB), Ki67 and activated Caspase-3. (B) Quantification of the percentage of positive cells corresponding to each staining (Mann-Whitney test, n=5 to 6). Note: one untreated tumor added to vehicle group. (C) Gene Set Enrichment Analysis (GSEA) showed significant depletion of HALLMARK\_E2F\_TARGETS in ribociclib versus vehicle treated tumors. (D) mRNA relative level of selected E2F target genes quantified by qRT-PCR (Mann-Whitney test, n=5 per group,  $p \leq 0.05$  (\*)).

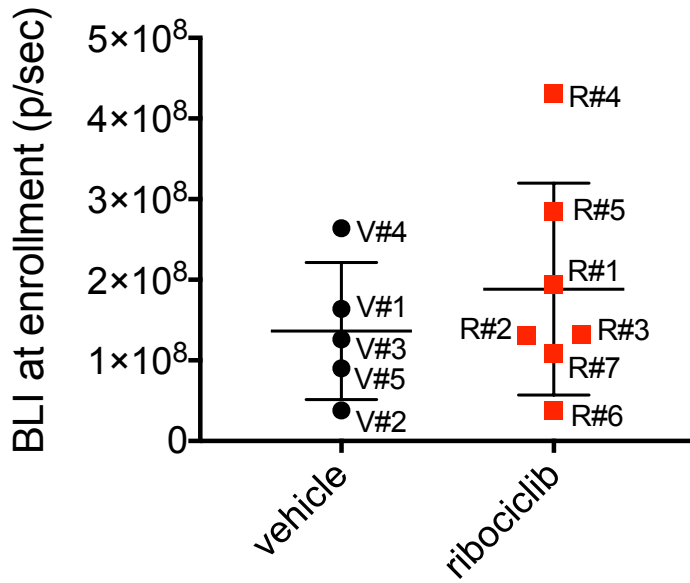

**Supplementary Figure S2. Brain bioluminescence signal at enrollment of the pharmacodynamic study presented in Fig 1G-J.** Mice bearing mouse G3MB tumor #2416 submitted to bioluminescence imaging (BLI) seven days post-implant and enrolled in a pharmacodynamic study. Randomization in two treatment groups : vehicle (V#1-V#5) or ribociclib (R#1-R#7).

## SJMBG3-12-5950

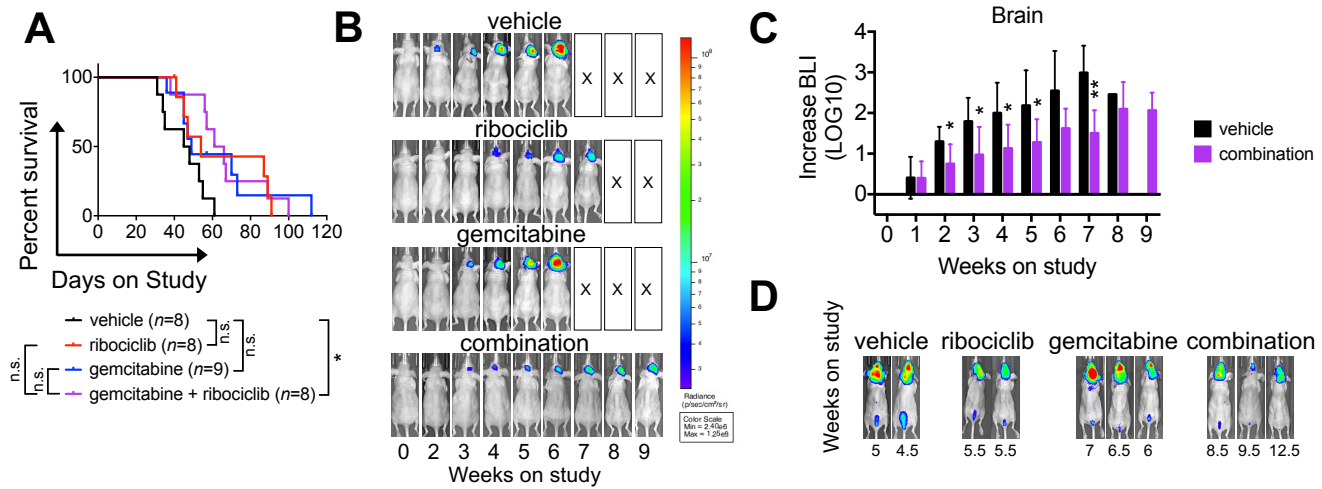

**Supplementary Figure S3. Combination therapy of ribociclib and gemcitabine improves survival of mice bearing human G3MB PDOX SJMBG3-12-5950.** (A-D) Mice bearing SJMBG3-12-5950 treated with vehicle (black lines), ribociclib (100mg/kg, continuous daily, by oral gavage (OG), red lines), gemcitabine (60mg/kg, intravenously (IV), day1 & day15 every 2 weeks, blue lines), or the combination (purple lines) until moribund. (A) Kaplan-Meier survival for each treatment groups. Comparison between treatment groups using log-rank test adjusted for multiple comparisons (not significant (n.s.) and adjusted  $p \leq 0.05$  (\*). Mice were censored if they died or required humane euthanasia not related to tumor and without neurologic symptoms (e.g., death during sedation for imaging). Mice underwent twice weekly bioluminescence imaging (BLI). (B) BLI pictures at different time points from enrollment through moribund stage for one representing mouse per treatment group. Mice were selected based on tumor and spinal growth median behavior. (C) BLI increase from enrollment (LOG10 transformation) for the brain (Mann-Whitney test,  $p \leq 0.05$  (\*),  $p \leq 0.01$  (\*\*)). (D) Endpoint BLI images of mice with visible spinal signal based on the scale.

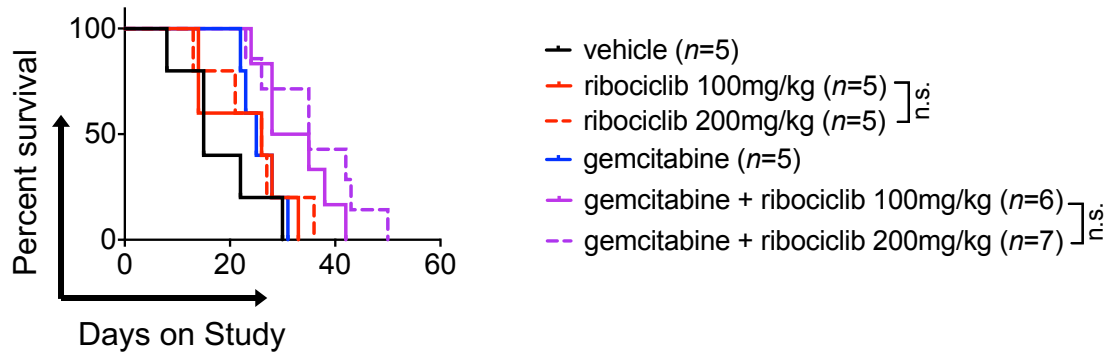

**Supplementary Figure S4. Combination therapy of ribociclib and gemcitabine in mice bearing mouse G3MB tumor #2416.** Mice bearing the mouse G3MB tumor #2416 treated with vehicle (black lines), ribociclib (100mg/kg, day1-21 (3 weeks), OG, red lines), ribociclib (200mg/kg, day1-21 (3 weeks), OG, red dotted lines), gemcitabine (60mg/kg, IV, day1 & day15 every 2 weeks, blue lines), the combination of gemcitabine (60mg/kg, IV, day1 & day15) and ribociclib (100mg/kg, day1-21, OG, purple lines) or the combination of gemcitabine (60mg/kg, IV, day1 & day15) and ribociclib (200mg/kg, day1-21, OG, purple dotted lines). Mice were treated with sequential cycles of therapy until moribund. Kaplan-Meier survival for each treatment groups. Comparison between treatment groups using log-rank test adjusted for multiple comparisons. Mice were censored if they died or required humane euthanasia not related to tumor and without neurologic symptoms (e.g., death during sedation for imaging).

## #9730

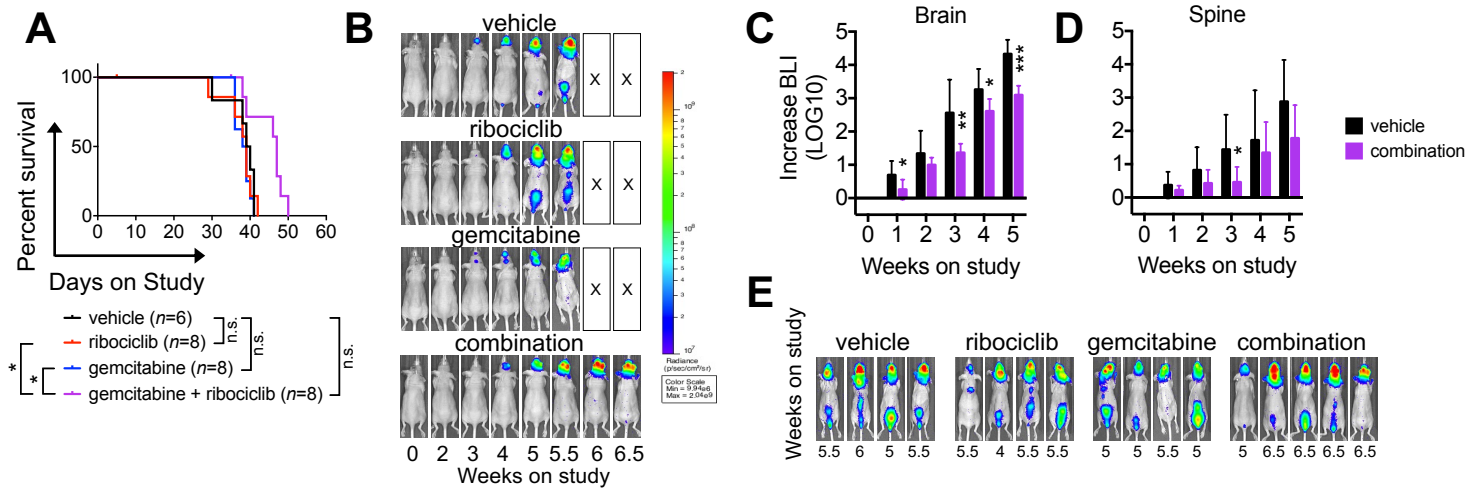

**Supplementary Figure S5. Combination therapy of ribociclib and gemcitabine in mice bearing mouse G3MB tumor #9730.** (A-D) Mice bearing the mouse G3MB tumor #9730 treated with vehicle (black lines), ribociclib (100mg/kg, day1-21 (3 weeks), OG, red lines), gemcitabine (60mg/kg, IV, day1 & day15 every 2 weeks, blue lines), or the combination of gemcitabine (60mg/kg, IV, day1 & day15) and ribociclib (100mg/kg, day1-21, OG, purple lines). Mice were treated with sequential cycles of therapy until moribund. (A) Kaplan-Meier survival for each treatment groups. Comparison between treatment groups using log-rank test adjusted for multiple comparisons (not significant (n.s.) and adjusted  $p \leq 0.05$  (\*). Mice were censored if they died or required humane euthanasia not related to tumor and without neurologic symptoms (e.g., death during sedation for imaging). Mice underwent twice weekly bioluminescence imaging (BLI). (B) BLI pictures at different time points from enrollment through moribund stage for one representing mouse per treatment group. Mice were selected based on tumor and spinal growth median behavior. (C, D) BLI increase from enrollment (LOG10 transformation) for brain (C) and spine (D) (Mann-Whitney test,  $p \leq 0.05$  (\*),  $p \leq 0.01$  (\*\*),  $p \leq 0.001$  (\*\*\*)). (E) Endpoint BLI images of mice with visible spinal signal based on the scale.



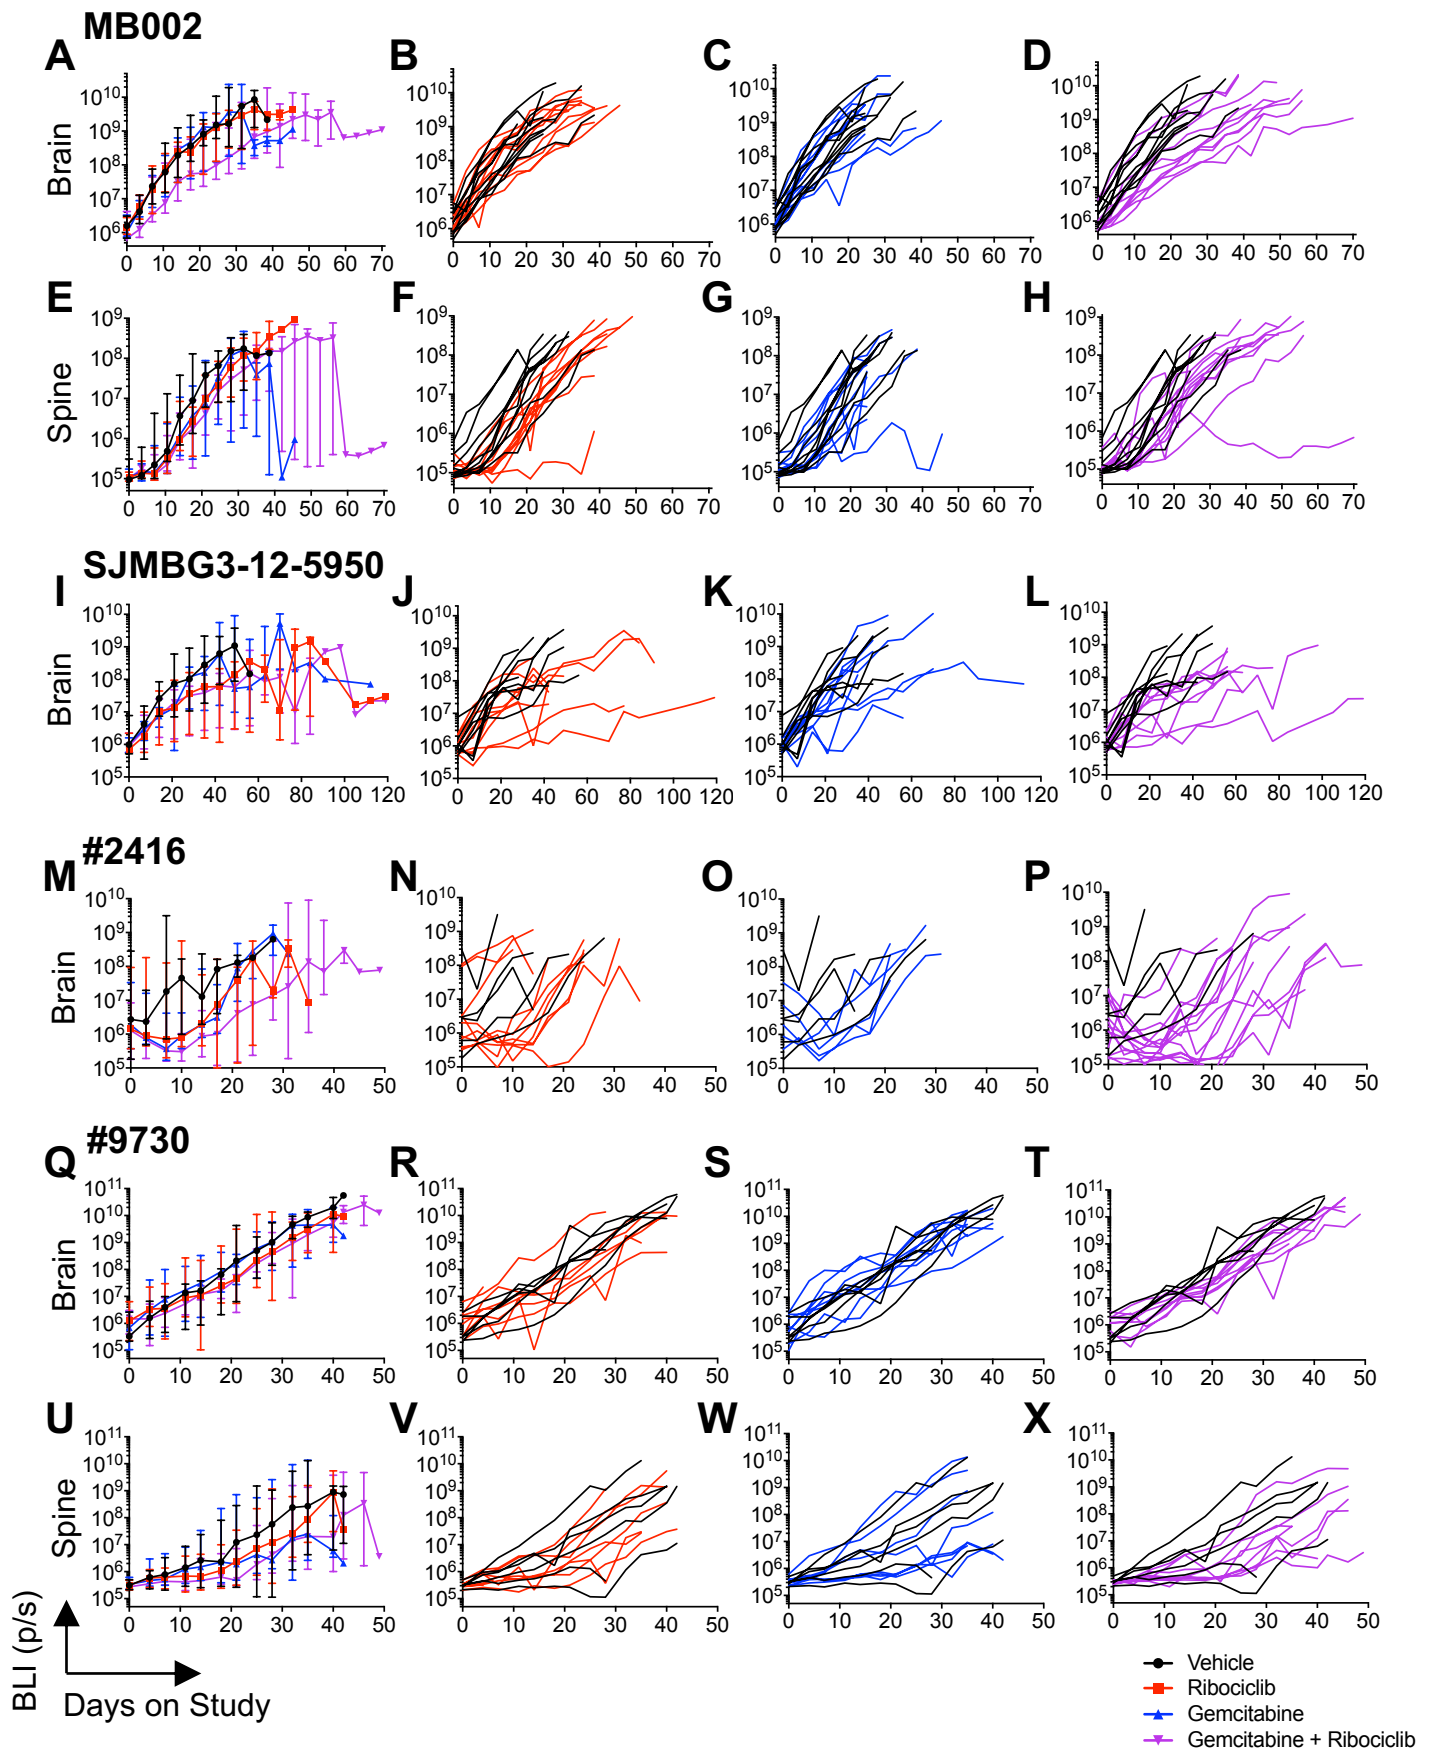

**Supplementary Figure S6. Bioluminescence imaging of mouse and human G3MB treated with ribociclib and gemcitabine as single agent and in combination.** Mice bearing human G3MB PDOXs MB002 (A-H) and SJMBG3-12-5950 (I-L) and mouse G3MB tumors #2416 (M-P) and #9730 (Q-X) treated with vehicle (black lines), ribociclib (red lines), gemcitabine (blue lines) or the combination of ribociclib and gemcitabine (purple lines) in **Fig. 2** and **Supplementary Fig S2** were imaged twice weekly by bioluminescence imaging (BLI) from enrollment through moribund stage. Median bioluminescence of the brain (A, I, M, Q) and spine (E, U). BLI of the brain (B-D, J-L, N-P, R-T) and spine (F-H, V-X) for each individual mice in all four treatment groups.

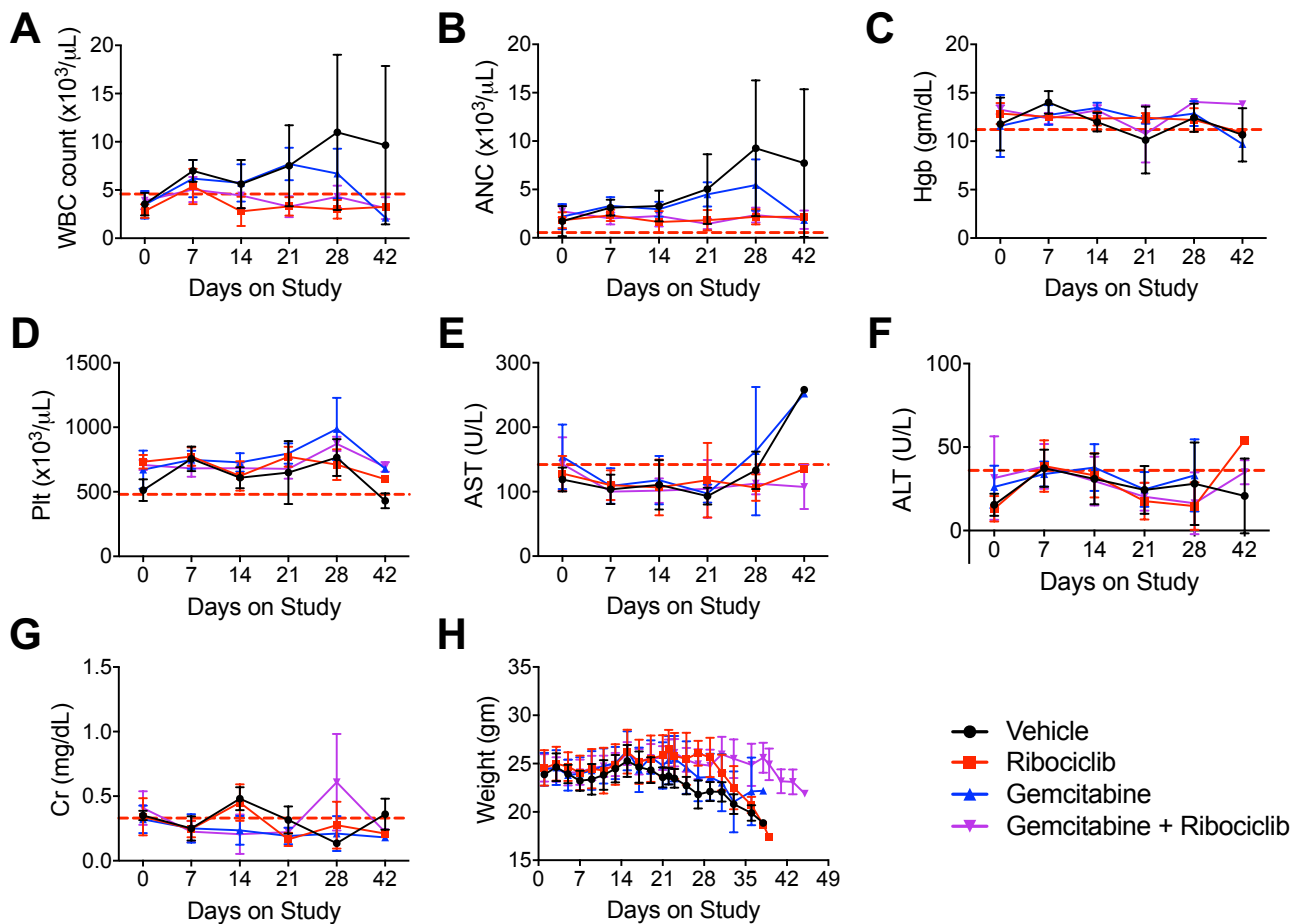

**Supplementary Figure S7. Mouse toxicity profiles.** Mice orthotopically implanted with the mouse G3MB tumor #9730 were treated with vehicle (black lines), ribociclib (red lines), gemcitabine (blue lines) or the combination of ribociclib and gemcitabine (purple lines). Complete blood counts of weekly blood collection include (A) white blood cell (WBC), (B) absolute neutrophil (ANC: absolute neutrophil count), (C) hemoglobin (Hgb), (D) platelet (Plt), and chemistry panel including (E) aspartate aminotransferase (AST), (F) alanine aminotransferase (ALT), and (G) creatine (Cr). (H) Body weight was measured before each dose. Blood counts and body weight were graphed as the mean values  $\pm$  SD. Red dashed lines indicate the lower limit of normal for CD1 nu/nu mice. Similar data were found for mice bearing the human G3MB PDOX SJMBG3-12-5950 (data not shown).

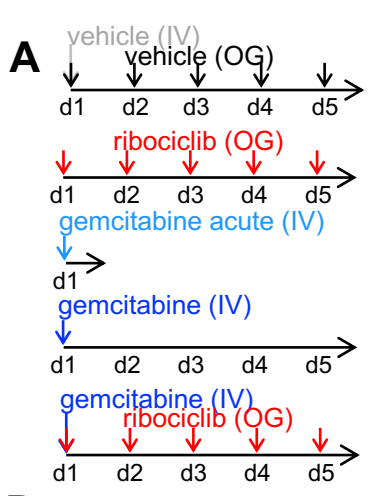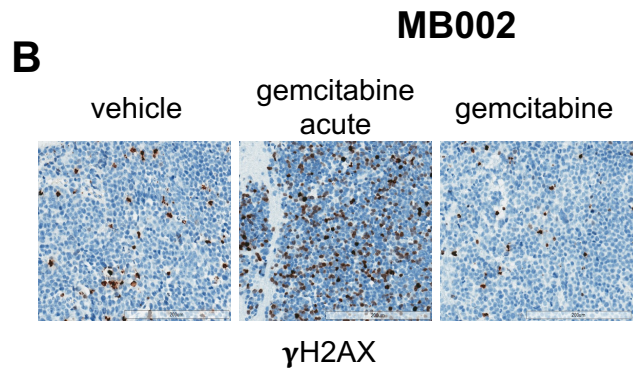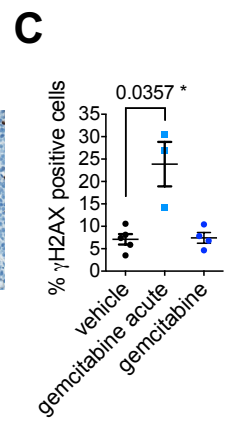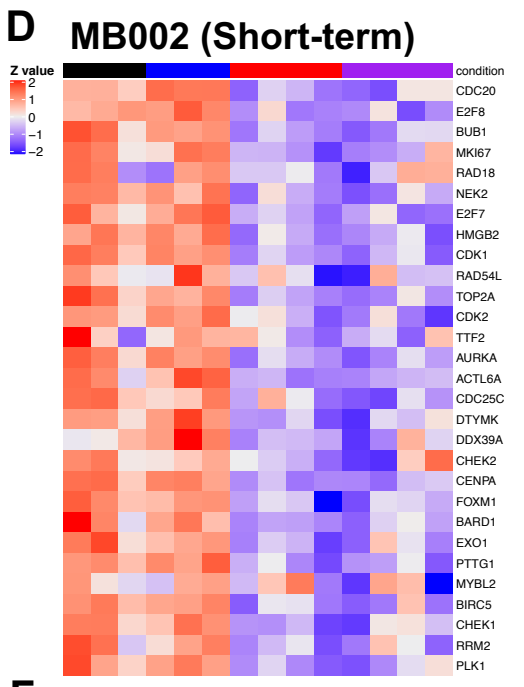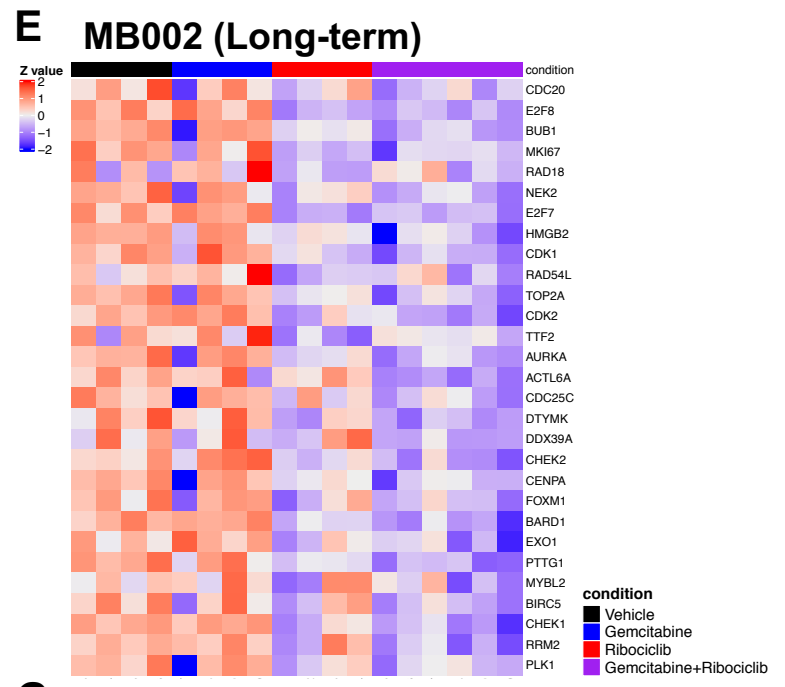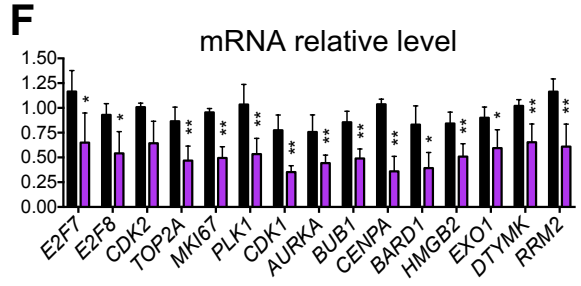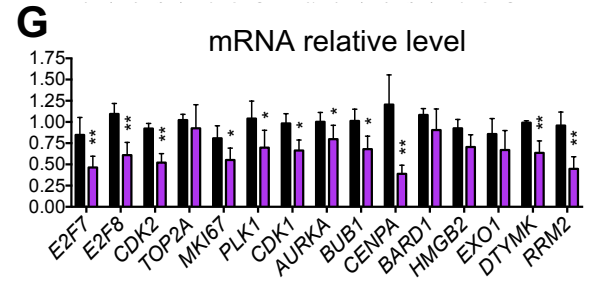

**Supplementary Figure S8. DNA damage after gemcitabine treatment and expression of selected genes in a human G3MB tumor treated with gemcitabine and ribociclib.** (A) Short-term treatment schedule with gemcitabine (60mg/kg) and ribociclib (100mg/kg). (B) Representative immunohistochemistry images of tumors treated with vehicle or gemcitabine and collected 4 hours (acute) or 4 days (on day 5) post-dose. Tumors were immuno-stained with an antibody against gamma-H2AX. (C) Quantification of the percentage of positive cells in each treatment (Mann-Whitney test,  $p \leq 0.05$  (\*)). (D, E) RNA-Seq derived expression heatmaps of selected genes in tumors from the four treatment groups after short-term and long-term treatment, respectively. (F, G) Relative mRNA level of a selection of genes was quantified by qRT-PCR in vehicle and combination treated tumors after short-term and long-term treatment, respectively (Mann-Whitney test,  $n=4$  to 7 per group for short-term and  $n=4$  to 6 per group for long-term,  $p \leq 0.05$  (\*),  $p \leq 0.01$  (\*\*)).

# SJMBG3-12-5950 (Long-term)

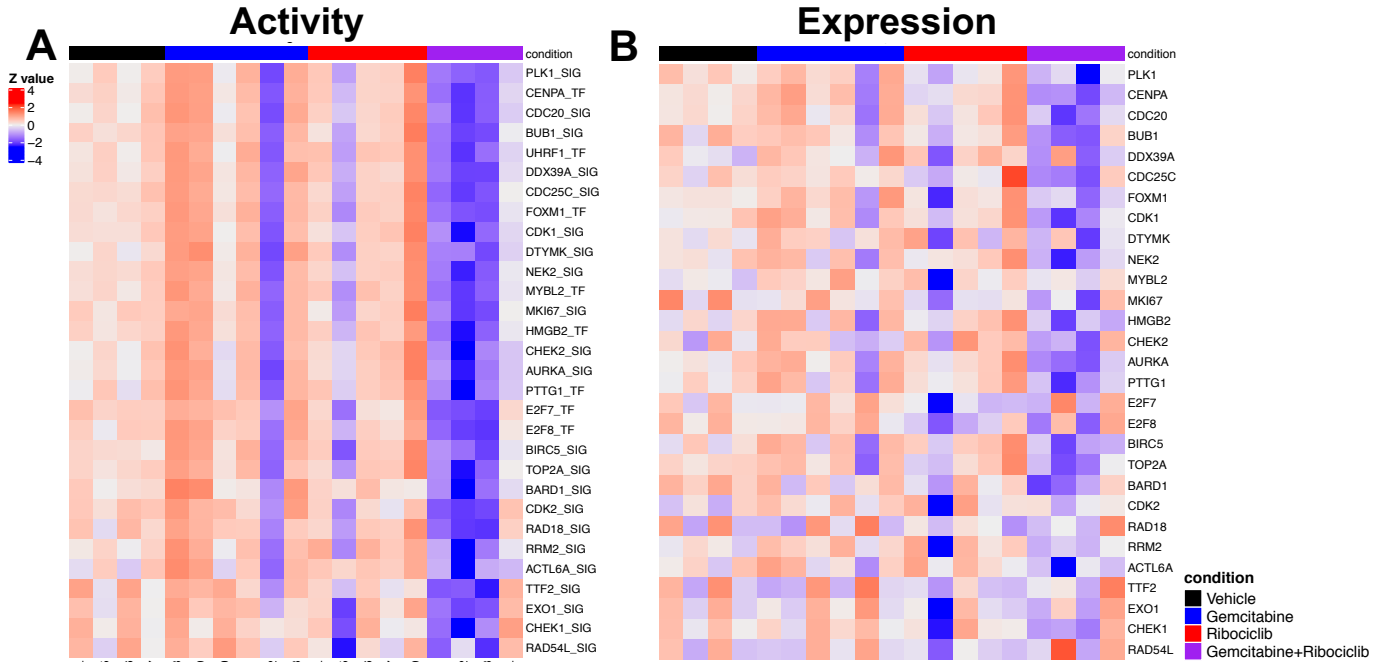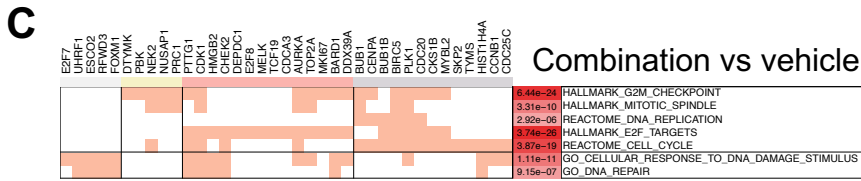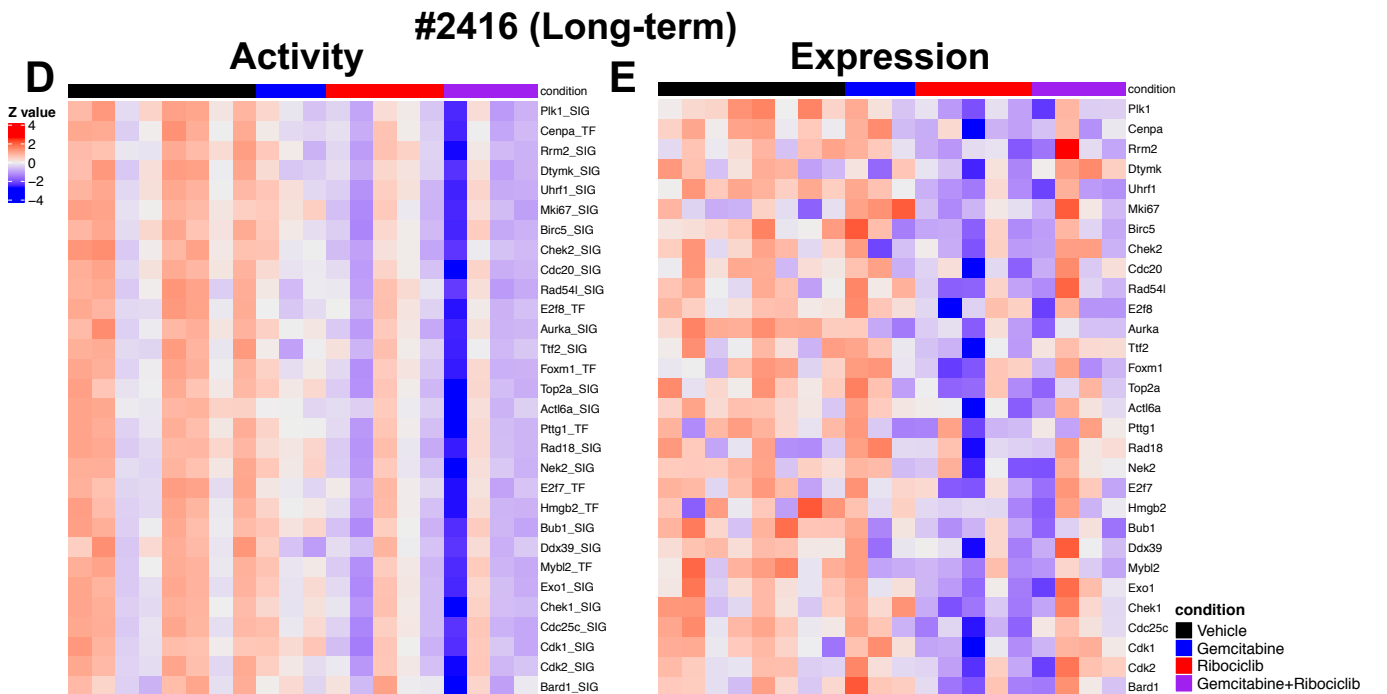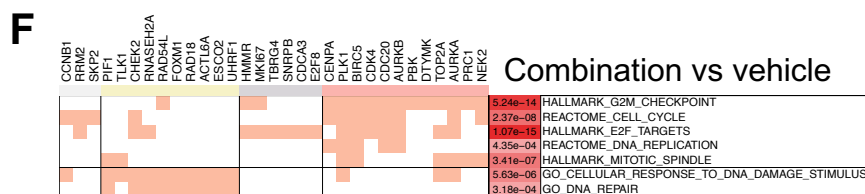

**Supplementary Figure S9. Combination of ribociclib and gemcitabine decreases the activity of genes involved in cell cycle regulation and DNA damage response in human and mouse G3MB tumors.** Mice bearing human SJMBG3-12-5950 PDOX (**A, B, C**) or mouse tumor #2416 (**D, E, F**) tumors were treated with vehicle (black bar), gemcitabine (60mg/kg, blue bar), ribociclib (100mg/kg, red bar) or both (purple bar) following the treatment schedules presented in Fig. 2A and B, respectively. Tumors were harvested at moribund stage (long-term). NetBID was used to infer gene activity from RNA-seq data and a medulloblastoma-specific interactome. (**A, D**) Activity heatmaps of selected genes in tumors from the four treatment groups. (**B, E**) RNA-Seq derived expression heatmaps of selected genes in tumors from the four treatment groups. (**C, F**) Clustering of genes involved in down-regulated pathways.

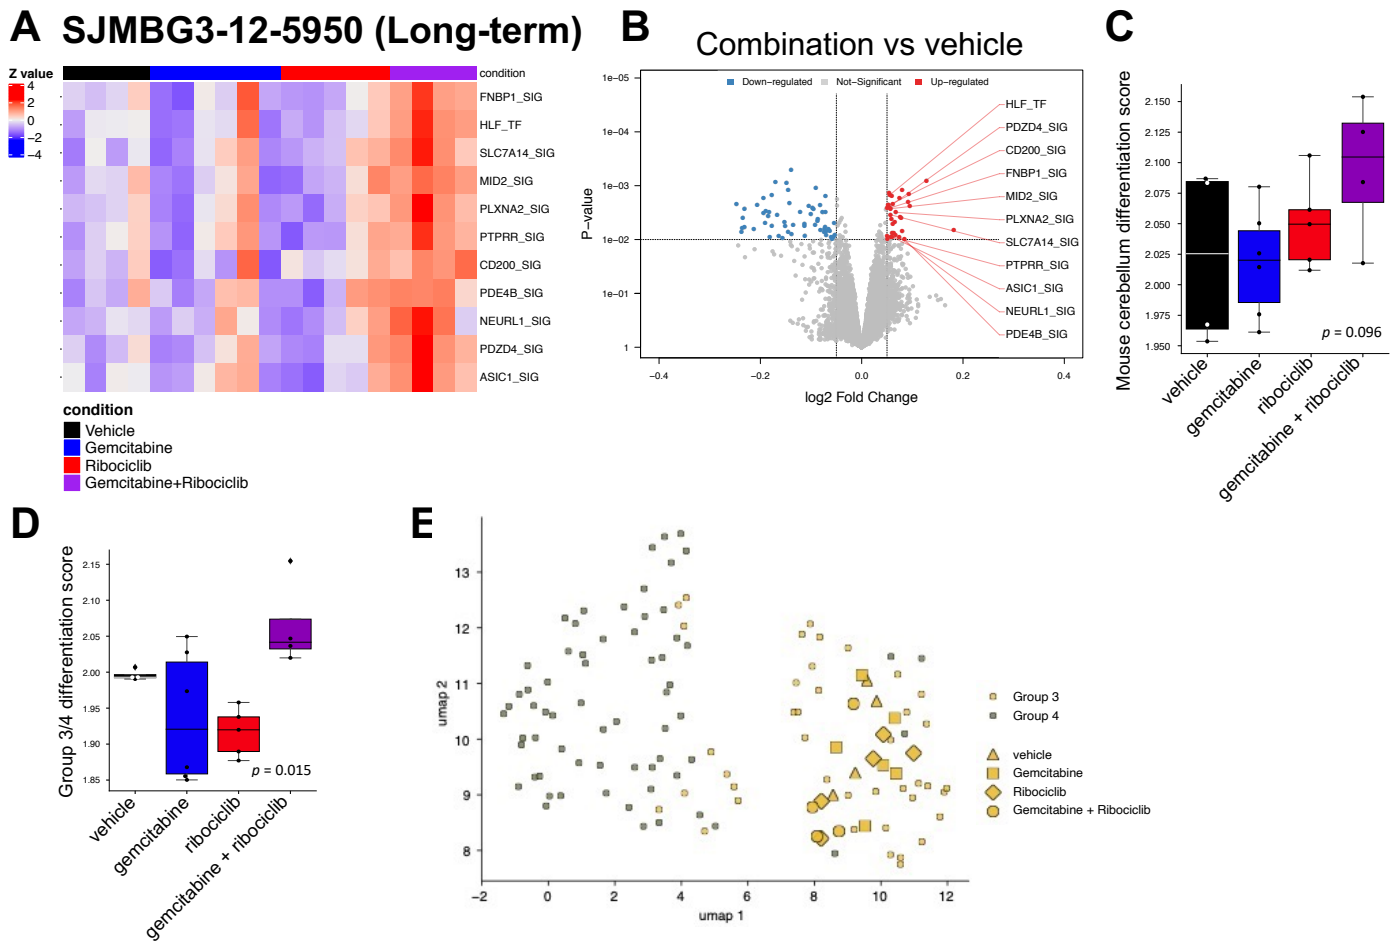

**Supplementary Figure S10. Long-term combination of ribociclib and gemcitabine increases the activity of genes conferring neuronal identity and the differentiation score in human G3MB.** Mice bearing human PDOX SJMBG3-12-5950 were treated with vehicle (black bar), gemcitabine (blue bar), ribociclib (red bar) and combination of ribociclib and gemcitabine (purple bar) as for tumors in **Fig. 4**. Tumors harvested at moribund stage (long-term) were analyzed following the NetBID pipeline or for cell fate evaluation after RNA sequencing. **(A)** Activity heatmap of selected genes in tumors from the four treatment groups. **(B)** Volcano plot highlighting genes with differential activity between tumors treated with gemcitabine and ribociclib versus vehicle (network size > 25;  $p < 0.01$  and  $\log_{2}FC < -0.05$  or  $\log_{2}FC > 0.05$ ). **(C)** Differentiation scores for each tumor computed from a single-cell RNA-seq dataset from the developing mouse cerebellum (Mann-Whitney test, gemcitabine + ribociclib versus vehicle). **(D)** G3/G4 differentiation score (Mann-Whitney test, gemcitabine + ribociclib versus vehicle). **(E)** Clustering of the tumors obtained from the preclinical studies with primary G3 and G4MB tumors.
